# Supplementary material for: Herbal medicines for cancer cachexia: protocol for a systematic review
Source: PubMed Central journal article supplement — BMJ Open. 2014 Jun 3;4(6):e005016. doi: 10.1136/bmjopen-2014-005016 (PMC4054631; doi:10.1136/bmjopen-2014-005016), 2014-06-03
Supplement: bmjopen-2014-005016.draft_revisions.pdf [file bmjopen-2014-005016.draft_revisions.pdf]

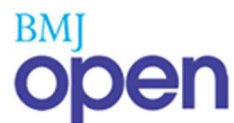

## Herbal medicines for cancer cachexia : Protocol for a systematic review

|                                 |                                                                                                                                                                                                                                                                                                                                                                                                                       |
|---------------------------------|-----------------------------------------------------------------------------------------------------------------------------------------------------------------------------------------------------------------------------------------------------------------------------------------------------------------------------------------------------------------------------------------------------------------------|
| Journal:                        | <i>BMJ Open</i>                                                                                                                                                                                                                                                                                                                                                                                                       |
| Manuscript ID:                  | bmjopen-2014-005016                                                                                                                                                                                                                                                                                                                                                                                                   |
| Article Type:                   | Protocol                                                                                                                                                                                                                                                                                                                                                                                                              |
| Date Submitted by the Author:   | 07-Feb-2014                                                                                                                                                                                                                                                                                                                                                                                                           |
| Complete List of Authors:       | Park, Bongki; Korea Institute of Oriental Medicine, Medical Research Division<br>Jun, Ji Hee; Korea Institute of Oriental Medicine, Medical Research Division<br>Jung, Jeeyoun; Korea Institute of Oriental Medicine, Medical Research Division<br>You, Sooseong; Korea Institute of Oriental Medicine, Medical Research Division<br>Lee, Myeong Soo; Korea Institute of Oriental Medicine, Medical Research Division |
| <b>Primary Subject Heading</b>: | Complementary medicine                                                                                                                                                                                                                                                                                                                                                                                                |
| Secondary Subject Heading:      | Oncology                                                                                                                                                                                                                                                                                                                                                                                                              |
| Keywords:                       | COMPLEMENTARY MEDICINE, Adult oncology < ONCOLOGY, Herbal medicine < THERAPEUTICS                                                                                                                                                                                                                                                                                                                                     |
|                                 |                                                                                                                                                                                                                                                                                                                                                                                                                       |

SCHOLARONE™  
Manuscripts

Only

1  
2  
3  
4  
5  
6  
7  
8  
9

## Herbal medicines for cancer cachexia : Protocol for a systematic review

10  
11  
12  
13  
14  
15  
16  
17  
18  
19

Bongki Park, Ji Hee Jun, Jeeyoun Jung, Sooseong You, Myeong Soo Lee

20  
21  
22  
23  
24  
25  
26  
27  
28  
29  
30  
31  
32  
33  
34

*Medical Research Division, Korea Institute of Oriental Medicine, Daejeon, South Korea*

35  
36  
37  
38  
39  
40  
41  
42  
43  
44  
45  
46  
47  
48  
49  
50  
51  
52  
53  
54  
55  
56  
57  
58  
59  
60

Running title: Protocol of systematic review of herbal medicine for cancer cachexia

**\*Correspondence to:**

Myeong Soo Lee, PhD

Medical Research Division,

Korea Institute of Oriental Medicine,

Daejeon, 305-811, South Korea

Tel: 82-(0)42-868-9266

Fax: 82-(0)42-868-9622

E-mail: drmslee@gmail.com

Park BK: sanisapa@kiom.re.kr

Jun JH: zhixi04@kiom.re.kr

Jung JY: jjy0918@kiom.re.kr

You SS: ethink33@kiom.re.kr

Lee MS: drmslee@gmail.com

1  
2  
3  
4 License statement  
5

6 *The Corresponding Author has the right to grant on behalf of all authors and does grant on*  
7 *behalf of all authors, an exclusive licence (or non-exclusive for government employees) on a*  
8 *worldwide basis to the BMJ Publishing Group Ltd and its Licensees to permit this article (if*  
9 *accepted) to be published in BMJ Open and any other BMJ PGL products to exploit all*  
10 *subsidiary rights, as set out in our licence ([http://group.bmj.com/products/journals/](http://group.bmj.com/products/journals/instructions-for-authors/licence-forms)*  
11 *instructions-for-authors/licence-forms).*  
12  
13  
14  
15  
16  
17  
18  
19  
20  
21  
22  
23  
24  
25  
26  
27  
28  
29  
30  
31  
32  
33  
34  
35  
36  
37  
38  
39  
40  
41  
42  
43  
44  
45  
46  
47  
48  
49  
50  
51  
52  
53  
54  
55  
56  
57  
58  
59  
60

## Abstract

**Introduction:** To assess the efficacy of herbal medicines as a treatment of cancer cachexia.

**Methods and analysis:** We will search the following thirteen electronic databases from their inception. MEDLINE (PubMed), the Cochrane Central Register of Controlled Trials (CENTRAL), EMBASE, Allied and Complementary Medicine Database (AMED), China National Knowledge Infrastructure (CNKI), Wanfang, Journal Integration Platform (VIP) and six Korean Medical Databases (Korean Studies Information, DBPIA, Korea Institute of Science Technology Information, Research Information Center for Health Database, Korean Medline, and National Assembly Library) without restrictions on time or language. The data will be extracted independently by two authors using pre-defined criteria. Disagreements will be resolved by discussion between the authors. The risk of bias will be assessed using the Cochrane of risk of bias tool.

**Dissemination:** The review will be published in a journal. The review will also be disseminated electronically and in print. An updated of the review will be conducted to inform and guide healthcare practice and policy.

**Trial registration number:** PROSPERO 2013:CRD42013006612

**Keywords:** Cancer, cachexia, herbal medicine, traditional East Asian medicine, randomised clinical trials, systematic review

### Article focus

- *This systematic review aims to evaluate randomized controlled trials and quasi-randomised trials and to present the efficacy of herbal medicines for cancer cachexia.*

### Key messages

- *This systematic review will be performed with a comprehensive search strategy and will establish the current state of the evidence using unbiased methods.*

### Strengths and limitations of this study

- *The strength of this review is its extensive, unbiased search of various databases without language restriction.*
- *The trial screening and data extraction will be conducted independently by two authors.*
- *The review team consists of experts from each field: traditional Korean medicine (Park BK, Jung JY), traditional Chinese medicine (Jun JH), conventional medicine (You SS) and methodology (Lee MS).*

## Introduction

### *Description of the condition*

Cancer cachexia is a common syndrome among cancer patients, especially in advanced cancer. More than 70~80% of advanced cancer patients suffer from cachexia.<sup>1</sup>

Generally, cachexia is characterised by loss of weight, muscle atrophy, anorexia and fatigue.

The definition of cancer cachexia differs slightly according to the research study,<sup>2-5</sup> but the recent international consensus has defined cancer cachexia as a multifactorial syndrome characterised by ongoing loss of skeletal muscle mass (with or without loss of fat mass) that cannot be fully reversed by conventional nutritional support and leads to progressive functional impairment.<sup>4</sup> The pathophysiology of cancer cachexia is a negative energy balance caused by a variable combination of reduced food intake and abnormal metabolism.<sup>4 6</sup> The metabolic mechanisms of adipose mass reduction, loss of skeletal muscle and protein degradation are known to be mediated by pro-inflammatory cytokines, neuropeptides, hormones, catabolic factors and digestive factors.<sup>1 6-8</sup>

Cancer cachexia causes numerous clinical problems. Cancer cachexia reduces activity or quality of life<sup>9</sup> and restricts conventional therapy such as chemotherapy.<sup>10</sup> Above all, Cancer cachexia is associated with a poor survival rate.<sup>11 12</sup> In various cancer types, the survival of patients with cachexia is shorter than that of other patients.<sup>1</sup>

### *Description of the intervention*

There are several agents for managing cancer cachexia. Megestrol acetate, cannabinoids, corticosteroids and ghrelin are known to affect appetite. EPA, HMB, thalidomide, corticosteroids and non-steroidal anti-inflammatory drugs are known to affect cachectic mediators or signal pathways.<sup>1 6 13</sup> Some drugs, such as megestrol acetate and corticosteroids exhibit confirmed effectiveness in combatting cancer cachexia by randomised controlled

1  
2  
3  
4 trials and systematic reviews.<sup>1</sup> However, to date, there is no identified standard treatment for  
5  
6 cancer cachexia.  
7

8 Herbal medicines have been used widely to treat diverse diseases for thousands of years.  
9  
10 Especially in East Asia, herbal medicines have been developed on a basis of unique theories:  
11  
12 Yin and Yang, the five elements and visceral manifestation theory. The major principle of  
13  
14 treating diseases is reinforcing the healthy qi and eliminating the pathogenic factors. Many  
15  
16 herbal medicines are prescribed according to this principle.  
17

18  
19 Recently, herbal medicines have been used to alleviate the adverse effects of conventional  
20  
21 therapies or to improve a quality of life. A survey demonstrated that 75% of colorectal cancer  
22  
23 patients used at least one type of complementary alternative medicine (CAM) during their  
24  
25 lifetimes.<sup>14</sup> Another survey reported that 39% of breast cancer patients used herbs or medical  
26  
27 herbal teas.<sup>15</sup>  
28  
29

### 30 31 32 ***How the intervention might work***

33  
34 Some herbs, such as ginseng radix, astragali radix or some herbal prescriptions, are known to  
35  
36 increase appetite, facilitate physical function and boost immune function.<sup>16-20</sup> Other herbs,  
37  
38 such as coptidis rhizoma, exhibit anti-inflammatory functions.<sup>21-23</sup> Many herbs are associated  
39  
40 with anti-cancer properties including cancer cell - cytotoxicity, cell-apoptosis and invasion  
41  
42 and metastasis prevention.<sup>24-26</sup>  
43  
44

45  
46 Many practitioners and researchers have attempted to explore herbal medicines for the  
47  
48 treatment of cancer cachexia. The oral administration of Rikkunshito is known to stimulate  
49  
50 ghrelin secretion.<sup>27</sup> One research study reported that coptidis rhizoma might exhibit an anti-  
51  
52 cachectic effect and that berberine, the major component, might prevent cancer-induced  
53  
54 cachexia.<sup>28</sup>  
55  
56  
57  
58  
59  
60

### ***Why it is important to do this review***

To our knowledge, no systematic reviews assessing herbal medicines in cancer cachexia have been conducted. There is no identified standard treatment for cancer cachexia, and a comprehensive evaluation of the efficacy and the safety of herbal medicines will inform the recommendation for treatment of cancer cachexia.

### **Objectives**

To assess the efficacy of herbal medicines for cancer cachexia.

### **Methods**

#### ***Criteria for considering studies for this review***

##### *Types of studies*

Randomised controlled trials (RCTs) and quasi-randomised trials (quasi-RCTs) will be included in this systematic review without restrictions on time or language.

##### *Types of participants*

The participants will include cancer patients diagnosed by histological or clinical diagnosis who meet the international consensus of cancer cachexia<sup>4</sup>. The diagnostic criteria for cancer cachexia are as follows :

1. Weight loss > 5% over the past 6 months (in absence of simple starvation); or
2. Body Mass Index (BMI) < 20 and any degree of weight loss > 2%; or
3. Appendicular skeletal muscle index consistent with sarcopenia (males < 7.26 kg/m; females < 5.45 kg/m) and any degree of weight loss > 2%

##### *Types of interventions*



1  
2  
3  
4 All types of herbal medicines will be included. There is no limitation on the number of herbs,  
5  
6 administration methods, dosage or duration of treatment. The comparisons will be either with  
7  
8 other therapeutic agents such as megestrol acetate or corticosteroids or with no other  
9  
10 treatment.  
11

### 12 13 14 15 *Types of outcome measures*

#### 16 17 Primary outcomes

- 18 1. Weight gain.
- 19 2. Body composition.

#### 20 21 22 Secondary outcomes

- 23 1. Improvement in quality of life by means of a validated instrument.
- 24 2. Increase of appetite.
- 25 3. Reduction in fatigue.
- 26 4. Serum levels of inflammatory markers, including ESR and CRP as well as TNF-alpha, IL-  
27 1, IL-6, and IFN-gamma.
- 28 5. Adverse effects.

### 29 30 31 32 33 34 35 36 37 38 39 40 41 *Search methods for the identification of studies*

#### 42 43 Electronic searches

44 We will search the following electronic databases regardless of publication date or language:

- 45 ● MEDLINE (PubMed),
- 46 ● The Cochrane Central Register of Controlled Trials (CENTRAL),
- 47 ● EMBASE,
- 48 ● Allied and Complementary Medicine Database (AMED),
- 49 ● China National Knowledge Infrastructure (CNKI),

- Wanfang Database.
- VIP (Journal Integration Platform)
- Six Korean Medical Databases (Korean Studies Information, DBPIA, Korea Institute of Science Technology Information, Research Information Center for Health Database, Korean Medline, and National Assembly Library)

### Other sources

We will scan the reference lists of reviews and retrieve articles for additional studies. In addition, we will search the WHO International Clinical Trials Registry Platform (ICTRP) (<http://apps.who.int/trialsearch/>), the metaRegister of Controlled Trials (mRCT) ([www.controlled-trials.com/mrct](http://www.controlled-trials.com/mrct)), clinical trials.gov ([www. Clinicaltrials.gov](http://www.Clinicaltrials.gov)) and Google scholar (<http://scholar.google.co.kr/>).

### *Search strategy*

We will model subject strategies for databases on the search strategy designed for MEDLINE (PubMed; see Appendix 1) and CNKI (see Appendix 2) and modify it for use in the other databases.

### ***Data collection and analysis***

#### *Selection of studies*

Two review authors (Park BK and Jun JH) will independently assess the titles and abstracts of articles searched by electronic databases and determine their eligibility for inclusion. Hard copies of the relevant articles will be retrieved. Disagreements will be resolved by discussion, if necessary, by the arbiter (Lee MS).

### *Data extraction and management*

Two review authors (Park BK and Jun JH) will read all the articles and independently extract the data using a standard data extraction form. The form includes methodology, participants, interventions, duration of treatment, outcomes and conclusions. Consensus will be reached by discussion in the case of discrepancy. When disagreements are not resolved by discussion, they will be arbitrated by another author (Lee MS).

### *Assessment of the risk of bias in the included studies*

Three authors (Park BK, You SS and Jung JY) will assess the risk of bias using the Cochrane tool of risk of bias (version 5.1.0).<sup>29</sup> The following items will be assessed: random sequence generation (selection bias), allocation concealment (selection bias), blinding (performance bias and detection bias), incomplete outcome data (attrition bias), selective outcome reporting (reporting bias) and other bias. The evaluated domains will be assessed as Yes, No or Unclear according to the criteria. We will resolve any disagreements by discussion or arbitration (Lee MS).

### *Measurement of the treatment effect*

We will use the mean difference (MD) with 95% confidence intervals (CI) for continuous outcomes or risk ratios (RR) with 95% CI for binary outcomes. In the case of the use of different measurement scales, standardised mean difference (SMD) analysis with 95% CI will be performed.

### *Units of analysis issues*

We will include data from parallel-group studies for the meta-analysis. If we include cross-over trials, only the first treatment period data will be analysed. When the trial has more than

1  
2  
3  
4 one control group, the unit of analysis will be applied to each group.  
5  
6  
7

#### 8 *Dealing with missing data*

9  
10 We will try to contact the corresponding authors by e-mail if there is any missing or  
11 insufficient data from the trial as much as possible. The intent-to-treat (ITT) principle will be  
12 applied for statistical analysis. The individual patient data will be sought from the original  
13 source or from the published trial reports when the individual patient data are unavailable.  
14  
15  
16  
17  
18  
19

#### 20 *Assessment of heterogeneity*

21  
22 We will use the random effects model for the meta-analysis. Heterogeneity will be assessed  
23 by inspecting the forest plots. In addition, heterogeneity will be tested by the  $I^2$  test for  
24 quantifying inconsistencies among the included studies. A result higher than 50% would  
25 represent substantial heterogeneity. If heterogeneity exists, we will conduct a subgroup  
26 analysis to examine the possible cause.<sup>30</sup>  
27  
28  
29  
30  
31  
32  
33  
34  
35  
36

#### 37 *Assessment of reporting biases*

38  
39 If more than 10 trials are included in the meta-analysis, we will conduct funnel plots to assess  
40 the potential for publication bias and small study effects.<sup>31</sup> Asymmetry in funnel plots  
41 implied possible small study effects, such as publication bias. We will include all eligible  
42 trials, regardless of their methodological quality.  
43  
44  
45  
46  
47  
48  
49

#### 50 *Data synthesis*

51  
52 If there are sufficient studies and comparable outcomes, we will perform a meta-analysis  
53 using random effect modelling.  
54  
55  
56

#### 57 1. Herbal medicine versus conventional medical treatments

1  
2  
3  
4 2. Herbal medicine versus no treatment  
5

6 3. Herbal medicine versus placebo  
7

8 4. Herbal medicine plus conventional medical treatment versus conventional medical  
9 treatment only  
10  
11

### 12 *Subgroup analysis and investigation of heterogeneity*

13  
14  
15  
16  
17 If there are sufficient data, subgroup analyses will be conducted to explore the differences in  
18 the effect sizes, type of cancer, stage of cachexia<sup>4</sup> and types of herbal medicine.  
19  
20

### 21 *Sensitivity analysis*

22  
23  
24 For sensitivity analysis, the meta-analysis will be repeated, substituting decisions  
25 alternatively to test the robustness of the primary decisions of the review process. The  
26 principal decision nodes are as follows:  
27  
28  
29

30  
31  
32  
33 1. Methodological quality (sequence generation, allocation concealment or blinding in the  
34 assessment of outcomes and symptom severity);  
35

36  
37 2. Sample size (small sample size studies, e.g., over 30 in each group)  
38  
39

### 40 41 **Ethics and dissemination**

42  
43  
44 Ethical approval is not required, given that this protocol is for a systematic review. The  
45 review will be disseminated widely through peer-reviewed publications and conference  
46 presentations.  
47  
48  
49

### 50 51 **Discussion**

52  
53  
54  
55 This is the protocol for a review and there is no primary data collection. The systematic  
56 review will be published in a peer-reviewed journal and disseminated electronically or in  
57  
58  
59  
60

1  
2  
3  
4  
5  
6  
7  
8  
9  
10  
11  
12  
13  
14  
15  
16  
17  
18  
19  
20  
21  
22  
23  
24  
25  
26  
27  
28  
29  
30  
31  
32  
33  
34  
35  
36  
37  
38  
39  
40  
41  
42  
43  
44  
45  
46  
47  
48  
49  
50  
51  
52  
53  
54  
55  
56  
57  
58  
59  
60

print. Updates of the review will be conducted to inform and guide healthcare practice and policy.

For peer review only

### Contribution of authors

All authors (Park BK, Jun JH, Jung JY, You SS and Lee MS) contributed to the drafting of the protocol. The protocol was revised, and the final version was approved by all authors. The search strategy was developed and will be run by Park BK and Jun JH. Copies of studies will be obtained by Park BK and Jun JH. Selection of the studies to include will be done by Park BK and Jun JH. Lee MS will act as an arbiter in the study selection stage. Extraction of data from studies will be conducted by Park BK, Jun JH, Jung JY and You SS. Entering data into RevMan will be conducted by Park BK, Jung JY. Carrying out the analysis will be done by Park BK, Jung JY and Lee MS. Interpretation of the analysis will be done by all authors. The final review will be drafted by all authors. The review will be updated by Park BK and Lee MS.

### Competing interests

None declared

### Funding

The authors were supported by Korea Institute of Oriental Medicine (K13400, K13281).

## References

1. Tuca A, Jimenez-Fonseca P, Gascon P. Clinical evaluation and optimal management of cancer cachexia. *Crit Rev Oncol Hematol* 2013;**88**:625-36.
2. Evans WJ, Morley JE, Argiles J, et al. Cachexia: a new definition. *Clin Nutr* 2008;**27**:793-9.
3. Muscaritoli M, Anker SD, Argiles J, et al. Consensus definition of sarcopenia, cachexia and pre-cachexia: joint document elaborated by Special Interest Groups (SIG) "cachexia-anorexia in chronic wasting diseases" and "nutrition in geriatrics". *Clin Nutr* 2010;**29**:154-9.
4. Fearon K, Strasser F, Anker SD, et al. Definition and classification of cancer cachexia: an international consensus. *Lancet Oncol* 2011;**12**:489-95.
5. Douglas E, McMillan DC. Towards a simple objective framework for the investigation and treatment of cancer cachexia: The Glasgow Prognostic Score. *Cancer treatment reviews*. *Cancer Treat Rev* Published Online First: 28 November 2013. doi: 10.1016/j.ctrv.2013.11.007.
6. Tisdale MJ. Mechanisms of cancer cachexia. *Physiol Rev* 2009;**89**:381-410.
7. Tsoli M, Robertson G. Cancer cachexia: malignant inflammation, tumorkines, and metabolic mayhem. *Trends Endocrinol Metab* 2013;**24**:174-83.
8. Fearon KC, Glass DJ, Guttridge DC. Cancer cachexia: mediators, signaling, and metabolic pathways. *Cell Metab* 2012;**16**:153-66.
9. Scott HR, McMillan DC, Brown DJ, et al. A prospective study of the impact of weight loss and the systemic inflammatory response on quality of life in patients with inoperable non-small cell lung cancer. *Lung Cancer* 2003;**40**:295-9.
10. Prado CM, Baracos VE, McCargar LJ, et al. Sarcopenia as a determinant of chemotherapy toxicity and time to tumor progression in metastatic breast cancer patients receiving capecitabine treatment. *Clin Cancer Res* 2009;**15**:2920-6.



- 1  
2  
3  
4 11. Ruiz Garcia V, Lopez-Briz E, Carbonell Sanchis R, et al. Megestrol acetate for treatment  
5  
6 of anorexia-cachexia syndrome. *Cochrane Database Syst Rev* 2013;**3**:CD004310.  
7
- 8  
9 12. Argiles JM, Olivan M, Busquets S, et al. Optimal management of cancer anorexia-  
10  
11 cachexia syndrome. *Cancer Management and Research* 2010;**2**:27-38.  
12
- 13 13. Nicolini A, Ferrari P, Masoni MC, et al. Malnutrition, anorexia and cachexia in cancer  
14  
15 patients: A mini-review on pathogenesis and treatment. *Biomed Pharmacother*  
16  
17 2013;**67**:807-17.  
18
- 19 14. Lawsin C, DuHamel K, Itzkowitz SH, et al. Demographic, medical, and psychosocial  
20  
21 correlates to CAM use among survivors of colorectal cancer. *Support Care Cancer*  
22  
23 2007;**15**:557-64.  
24
- 25 15. Matthews AK, Sellergren SA, Huo D, et al. Complementary and alternative medicine use  
26  
27 among breast cancer survivors. *J Altern Complement Med* 2007;**13**:555-62.  
28
- 29 16. Kang S, Min H. Ginseng, the 'Immunity Boost': The Effects of Panax ginseng on Immune  
30  
31 System. *J Ginseng Res* 2012;**36**:354-68.  
32
- 33 17. Shergis JL, Zhang AL, Zhou W, et al. Panax ginseng in randomised controlled trials: a  
34  
35 systematic review. *Phytother Res* 2013;**27**:949-65.  
36  
37
- 38 18. Harrold JA, Hughes GM, O'Shiel K, et al. Acute effects of a herb extract formulation and  
39  
40 inulin fibre on appetite, energy intake and food choice. *Appetite* 2013;**62**:84-90.  
41  
42
- 43 19. Ren S, Zhang H, Mu Y, et al. Pharmacological effects of Astragaloside IV: a literature  
44  
45 review. *J Tradit Chin Med* 2013;**33**:413-6.  
46  
47
- 48 20. Lee JJ, Lee JJ. A phase II study of an herbal decoction that includes Astragali radix for  
49  
50 cancer-associated anorexia in patients with advanced cancer. *Integr Cancer Ther*  
51  
52 2010;**9**:24-31.  
53
- 54 21. Lou T, Zhang Z, Xi Z, et al. Berberine inhibits inflammatory response and ameliorates  
55  
56 insulin resistance in hepatocytes. *Inflammation* 2011;**34**:659-67.  
57  
58  
59  
60

- 1  
2  
3  
4 22. Zhang J, Wang P, Ouyang H, et al. Targeting cancer-related inflammation: Chinese herbal  
5  
6 medicine inhibits epithelial-to-mesenchymal transition in pancreatic cancer. *PLoS*  
7  
8 *One* 2013;**8**:e70334.  
9
- 10 23. He DY, Dai SM. Anti-inflammatory and immunomodulatory effects of paeonia lactiflora  
11  
12 pall., a traditional chinese herbal medicine. *Front Pharmacol* 2011;**2**:10.  
13
- 14 24. Wang S, Wu X, Tan M, et al. Fighting fire with fire: poisonous Chinese herbal medicine  
15  
16 for cancer therapy. *J Ethnopharmacol* 2012;**140**:33-45.  
17
- 18 25. Lu JJ, Dang YY, Huang M, et al. Anti-cancer properties of terpenoids isolated from  
19  
20 Rhizoma Curcumae--a review. *J Ethnopharmacol* 2012;**143**:406-11.  
21
- 22 26. Chen X, Guo J, Bao J, et al. The Anticancer Properties of Salvia Miltiorrhiza Bunge  
23  
24 (Danshen): A Systematic Review. *Med Res Rev* Published Online First: 7 October  
25  
26 2013. doi: 10.1002/med.21304.  
27
- 28 27. Takeda H, Muto S, Nakagawa K, et al. Rikkunshito as a ghrelin enhancer. *Methods*  
29  
30 *Enzymol* 2012;**514**:333-51.  
31
- 32 28. Iizuka N, Miyamoto K, Hazama S, et al. Anticachectic effects of Coptidis rhizoma, an  
33  
34 anti-inflammatory herb, on esophageal cancer cells that produce interleukin 6. *Cancer*  
35  
36 *Lett* 2000;**158**:35-41.  
37
- 38 29. Higgins JPT, Altman DG, Sterne JAC. Chapter 8: Assessing risk of bias in included  
39  
40 studies. In: Higgins JPT, Green S, editors. *Cochrane Handbook for Systematic*  
41  
42 *Reviews of Interventions Version 5.1.0 (updated March 2011)*. : The Cochrane  
43  
44 Collaboration. Available from [www.cochrane-handbook.org](http://www.cochrane-handbook.org), 2011.  
45  
46  
47  
48  
49
- 50 30. Deeks JJ, Higgins JPT, Altman DG. Chapter 9: Analysing data and undertaking meta-  
51  
52 analyses. In: Higgins JPT, Green S, editors. *Cochrane Handbook for Systematic*  
53  
54 *Reviews of Interventions Version 5.1.0 (updated March 2011)*. : The Cochrane  
55  
56 Collaboration. Available from [www.cochrane-handbook.org](http://www.cochrane-handbook.org), 2011.  
57  
58  
59  
60

- 1  
2  
3  
4 31. Egger M, Davey Smith G, Schneider M, et al. Bias in meta-analysis detected by a simple,  
5  
6 graphical test. *BMJ* 1997;**315**:629-34.  
7  
8  
9  
10  
11  
12  
13  
14  
15  
16  
17  
18  
19  
20  
21  
22  
23  
24  
25  
26  
27  
28  
29  
30  
31  
32  
33  
34  
35  
36  
37  
38  
39  
40  
41  
42  
43  
44  
45  
46  
47  
48  
49  
50  
51  
52  
53  
54  
55  
56  
57  
58  
59  
60

## APPENDICES

### *Appendix 1. MEDLINE (Pubmed) search strategy*

#1. exp Neoplasms/

#2. (cancer or oncolog\* or neoplasm\* or malignan\* or tumor or tumour or carcinoma\* or adenocarcinoma\* or osteosarcoma\* or sarcoma\* or leukemi\* or lymphoma\* or teratoma\* or metastat\*).mp.

#3. #1 or #2

#4. exp Weight loss/

#5. exp Malnutrition/

#6. (cachexia\* or cachectic\* or weight loss or loss of weight or underweight or malnutrition or wasting syndrome or anorexia\* or muscle atrophy or sarcopenia).mp.

#7. or/#4-#6

#8. exp Medicine, East Asian Traditional/

#9. exp Drugs, Chinese herbal/

#10. exp Herbal Medicine/

#11. exp Plants, Medicinal/

#12. (traditional Korean medicine or traditional Chinese medicine or Traditional oriental medicine or Kampo medicine or alternative medicine or complementary medicine or herb or herbal or herbs or decoction\* or botanic\*).mp.

#13. or/#8-#12

#14. exp Randomized Controlled Trials as Topic/

#15. exp Clinical Trials as Topic/

#16. exp controlled clinical trials as topic/

#17. (randomized controlled trial\* or controlled clinical trial\* or randomized\* or randomly\* or placebo or clinical trial\* or controlled trial\*).mp.

1  
2  
3  
4 #18. or/#14 - #17  
5

6 #19. #3 and #7 and #13 and #18  
7  
8  
9

10  
11 *Appendix 2. CNKI search strategy*

12  
13 (恶病质 or 恶液质 or 癌症恶病质 or 癌恶病质 or 肿瘤恶病质 or 癌性恶病质) and  
14

15  
16 (中医药 or 中医 or 中西医结合 or 中药 or 中草药 or 中药制剂 or 汤 or 丸 or 散  
17

18  
19 or 注射液 or 口服液 or 中成药 or 饮) and (随机 or 对照)  
20  
21  
22  
23  
24  
25  
26  
27  
28  
29  
30  
31  
32  
33  
34  
35  
36  
37  
38  
39  
40  
41  
42  
43  
44  
45  
46  
47  
48  
49  
50  
51  
52  
53  
54  
55  
56  
57  
58  
59  
60

# BMJ Open

## Herbal medicines for cancer cachexia : Protocol for a systematic review

|                                 |                                                                                                                                                                                                                                                                                                                                                                                                                       |
|---------------------------------|-----------------------------------------------------------------------------------------------------------------------------------------------------------------------------------------------------------------------------------------------------------------------------------------------------------------------------------------------------------------------------------------------------------------------|
| Journal:                        | <i>BMJ Open</i>                                                                                                                                                                                                                                                                                                                                                                                                       |
| Manuscript ID:                  | bmjopen-2014-005016.R1                                                                                                                                                                                                                                                                                                                                                                                                |
| Article Type:                   | Protocol                                                                                                                                                                                                                                                                                                                                                                                                              |
| Date Submitted by the Author:   | 10-May-2014                                                                                                                                                                                                                                                                                                                                                                                                           |
| Complete List of Authors:       | Park, Bongki; Korea Institute of Oriental Medicine, Medical Research Division<br>Jun, Ji Hee; Korea Institute of Oriental Medicine, Medical Research Division<br>Jung, Jeeyoun; Korea Institute of Oriental Medicine, Medical Research Division<br>You, Sooseong; Korea Institute of Oriental Medicine, Medical Research Division<br>Lee, Myeong Soo; Korea Institute of Oriental Medicine, Medical Research Division |
| <b>Primary Subject Heading</b>: | Complementary medicine                                                                                                                                                                                                                                                                                                                                                                                                |
| Secondary Subject Heading:      | Complementary medicine, Oncology                                                                                                                                                                                                                                                                                                                                                                                      |
| Keywords:                       | COMPLEMENTARY MEDICINE, Adult oncology < ONCOLOGY, Herbal medicine < THERAPEUTICS                                                                                                                                                                                                                                                                                                                                     |
|                                 |                                                                                                                                                                                                                                                                                                                                                                                                                       |

SCHOLARONE™  
Manuscripts

Only

1  
2  
3  
4  
5  
6  
7  
8  
9

## Herbal medicines for cancer cachexia : Protocol for a systematic review

10  
11  
12  
13  
14  
15  
16  
17  
18  
19

Bongki Park, Ji Hee Jun, Jeeyoun Jung, Sooseong You, Myeong Soo Lee

*Medical Research Division, Korea Institute of Oriental Medicine, Daejeon, South Korea*

20  
21  
22  
23  
24  
25  
26  
27  
28  
29  
30  
31  
32  
33  
34

Running title: Protocol of systematic review of herbal medicine for cancer cachexia

**\*Correspondence to:**

Myeong Soo Lee, PhD

Medical Research Division,

Korea Institute of Oriental Medicine,

Daejeon, 305-811, South Korea

Tel: 82-(0)42-868-9266

Fax: 82-(0)42-868-9622

E-mail: drmslee@gmail.com

35  
36  
37  
38  
39  
40  
41  
42  
43  
44  
45  
46  
47  
48  
49  
50  
51  
52  
53  
54  
55  
56  
57  
58  
59  
60

Park BK: sanisapa@kiom.re.kr

Jun JH: zhixi04@kiom.re.kr

Jung JY: jjy0918@kiom.re.kr

You SS: ethink33@kiom.re.kr

Lee MS: drmslee@gmail.com

1  
2  
3  
4 License statement  
5

6 *The Corresponding Author has the right to grant on behalf of all authors and does grant on*  
7 *behalf of all authors, an exclusive licence (or non-exclusive for government employees) on a*  
8 *worldwide basis to the BMJ Publishing Group Ltd and its Licensees to permit this article (if*  
9 *accepted) to be published in BMJ Open and any other BMJ PGL products to exploit all*  
10 *subsidiary rights, as set out in our licence ([http://group.bmj.com/products/journals/](http://group.bmj.com/products/journals/instructions-for-authors/licence-forms)*  
11 *instructions-for-authors/licence-forms).*  
12  
13  
14  
15  
16  
17  
18  
19  
20  
21  
22  
23  
24  
25  
26  
27  
28  
29  
30  
31  
32  
33  
34  
35  
36  
37  
38  
39  
40  
41  
42  
43  
44  
45  
46  
47  
48  
49  
50  
51  
52  
53  
54  
55  
56  
57  
58  
59  
60



## Abstract

**Introduction:** To assess the efficacy of herbal medicines as a treatment of cancer cachexia.

**Methods and analysis:** We will search the following thirteen electronic databases from their inception. MEDLINE (PubMed), the Cochrane Central Register of Controlled Trials (CENTRAL), EMBASE, Allied and Complementary Medicine Database (AMED), China National Knowledge Infrastructure (CNKI), Wanfang, Journal Integration Platform (VIP) and six Korean Medical Databases (Korean Studies Information, DBPIA, Korea Institute of Science Technology Information, Research Information Center for Health Database, Korean Medline, and National Assembly Library) without restrictions on time or language. The data will be extracted independently by two authors using pre-defined criteria. Disagreements will be resolved by discussion between the authors. The risk of bias will be assessed using the Cochrane of risk of bias tool.

**Dissemination:** The review will be published in a journal. The review will also be disseminated electronically and in print. An update of the review will be conducted to inform and guide healthcare practice and policy.

**Trial registration number:** PROSPERO 2013:CRD42013006612

**Keywords:** Cancer, cachexia, herbal medicine, traditional East Asian medicine, randomised clinical trials, systematic review

### Article focus

- *This systematic review aims to evaluate randomized controlled trials and quasi-randomised trials and to present the efficacy of herbal medicines for cancer cachexia.*

### Key messages

- *This systematic review will be performed with a comprehensive search strategy and will establish the current state of the evidence using unbiased methods.*

### Strengths and limitations of this study

- *The strength of this review is its extensive, unbiased search of various databases without language restriction.*
- *The trial screening and data extraction will be conducted independently by two authors.*
- *The review team consists of experts from each field: traditional Korean medicine (Park BK, Jung JY), traditional Chinese medicine (Jun JH), conventional medicine (You SS) and methodology (Lee MS).*

## Introduction

### *Description of the condition*

Cancer cachexia is a common syndrome among cancer patients, especially in advanced cancer. More than 70~80% of advanced cancer patients suffer from cachexia.<sup>1</sup>

Generally, cachexia is characterised by loss of weight, muscle atrophy, anorexia and fatigue.

The definition of cancer cachexia differs slightly according to the research study,<sup>2-5</sup> but the recent international consensus has defined cancer cachexia as a multifactorial syndrome characterised by ongoing loss of skeletal muscle mass (with or without loss of fat mass) that cannot be fully reversed by conventional nutritional support and leads to progressive functional impairment.<sup>4</sup> The pathophysiology of cancer cachexia is a negative energy balance caused by a variable combination of reduced food intake and abnormal metabolism.<sup>4 6</sup> The metabolic mechanisms of adipose mass reduction, loss of skeletal muscle and protein degradation are known to be mediated by pro-inflammatory cytokines, neuropeptides, hormones, catabolic factors and digestive factors.<sup>1 6-8</sup>

Cancer cachexia causes numerous clinical problems. Cancer cachexia reduces activity or quality of life<sup>9</sup> and restricts conventional therapy such as chemotherapy.<sup>10</sup> Above all, Cancer cachexia is associated with a poor survival rate.<sup>11 12</sup> In various cancer types, the survival of patients with cachexia is shorter than that of other patients.<sup>1</sup>

### *Description of the intervention*

There are several agents for managing cancer cachexia. Megestrol acetate, cannabinoids, corticosteroids and ghrelin are known to affect appetite. EPA, HMB, thalidomide, corticosteroids and non-steroidal anti-inflammatory drugs are known to affect cachectic mediators or signal pathways.<sup>1 6 13</sup> Some drugs, such as megestrol acetate and corticosteroids exhibit confirmed effectiveness in combatting cancer cachexia by randomised controlled

1  
2  
3  
4 trials and systematic reviews.<sup>1</sup> However, to date, there is no identified standard treatment for  
5  
6 cancer cachexia.  
7

8 Herbal medicines have been used widely to treat diverse diseases for thousands of years.  
9  
10 Especially in East Asia, herbal medicines have been developed on a basis of unique theories:  
11  
12 Yin and Yang, the five elements and visceral manifestation theory. The major principle of  
13  
14 treating diseases is reinforcing the healthy qi and eliminating the pathogenic factors. Many  
15  
16 herbal medicines are prescribed according to this principle.  
17

18  
19 Recently, herbal medicines have been used to alleviate the adverse effects of conventional  
20  
21 therapies or to improve a quality of life. A survey demonstrated that 75% of colorectal cancer  
22  
23 patients used at least one type of complementary alternative medicine (CAM) during their  
24  
25 lifetimes.<sup>14</sup> Another survey reported that 39% of breast cancer patients used herbs or medical  
26  
27 herbal teas.<sup>15</sup>  
28  
29

### 30 31 32 ***How the intervention might work***

33  
34 Some herbs, such as ginseng radix, astragali radix or some herbal prescriptions, are known to  
35  
36 increase appetite, facilitate physical function and boost immune function.<sup>16-20</sup> Other herbs,  
37  
38 such as coptidis rhizoma, exhibit anti-inflammatory functions.<sup>21-23</sup> Many herbs are associated  
39  
40 with anti-cancer properties including cancer cell - cytotoxicity, cell-apoptosis and invasion  
41  
42 and metastasis prevention.<sup>24-26</sup>  
43  
44

45  
46 Many practitioners and researchers have attempted to explore herbal medicines for the  
47  
48 treatment of cancer cachexia. The oral administration of Rikkunshito is known to stimulate  
49  
50 ghrelin secretion.<sup>27</sup> One research study reported that coptidis rhizoma might exhibit an anti-  
51  
52 cachectic effect and that berberine, the major component, might prevent cancer-induced  
53  
54 cachexia.<sup>28</sup>  
55  
56  
57  
58  
59  
60

### ***Why it is important to do this review***

To our knowledge, no systematic reviews assessing herbal medicines in cancer cachexia have been conducted. There is no identified standard treatment for cancer cachexia, and a comprehensive evaluation of the efficacy and the safety of herbal medicines will inform the recommendation for treatment of cancer cachexia.

### **Objectives**

To assess the efficacy of herbal medicines for cancer cachexia.

### **Methods**

#### ***Criteria for considering studies for this review***

##### *Types of studies*

Randomised controlled trials (RCTs) and quasi-randomised trials (quasi-RCTs) will be included in this systematic review without restrictions on time or language.

##### *Types of participants*

The participants will include cancer patients diagnosed by histological or clinical diagnosis who meet the international consensus of cancer cachexia<sup>4</sup>. The diagnostic criteria for cancer cachexia are as follows :

1. Weight loss > 5% over the past 6 months (in absence of simple starvation); or
2. Body Mass Index (BMI) < 20 and any degree of weight loss > 2%; or
3. Appendicular skeletal muscle index consistent with sarcopenia (males < 7.26 kg/m; females < 5.45 kg/m) and any degree of weight loss > 2%

##### *Types of interventions*

1  
2  
3  
4 All types of herbal medicines will be included. There is no limitation on the number of herbs,  
5  
6 administration methods, dosage or duration of treatment. The comparisons will be either with  
7  
8 other therapeutic agents such as megestrol acetate or corticosteroids or with no other  
9  
10 treatment.  
11

### 12 13 14 15 *Types of outcome measures*

#### 16 17 Primary outcomes

- 18 1. Weight gain.
- 19 2. Body composition.

#### 20 21 22 Secondary outcomes

- 23 1. Improvement in quality of life by means of a validated instrument.
- 24 2. Increase of appetite.
- 25 3. Reduction in fatigue.
- 26 4. Serum levels of inflammatory markers, including ESR and CRP as well as TNF-alpha, IL-  
27 1, IL-6 and IFN-gamma
- 28 5. Survival rate
- 29 6. Adverse effects.

### 30 31 32 33 34 35 36 37 38 39 40 41 42 43 44 45 46 *Search methods for the identification of studies*

#### 47 48 Electronic searches

49 We will search the following electronic databases regardless of publication date or language:

- 50 ● MEDLINE (PubMed),
- 51 ● The Cochrane Central Register of Controlled Trials (CENTRAL),
- 52 ● EMBASE,

- Allied and Complementary Medicine Database (AMED),
- China National Knowledge Infrastructure (CNKI),
- Wanfang Database.
- VIP (Journal Integration Platform)
- Six Korean Medical Databases (Korean Studies Information, DBPIA, Korea Institute of Science Technology Information, Research Information Center for Health Database, Korean Medline, and National Assembly Library)

### Other sources

We will scan the reference lists of reviews and retrieve articles for additional studies. In addition, we will search the WHO International Clinical Trials Registry Platform (ICTRP) (<http://apps.who.int/trialsearch/>) and Google scholar (<http://scholar.google.co.kr/>).

### *Search strategy*

We will model subject strategies for databases on the search strategy designed for MEDLINE (PubMed; see Appendix 1) and CNKI (see Appendix 2) and modify it for use in the other databases.

### ***Data collection and analysis***

#### *Selection of studies*

Two review authors (Park BK and Jun JH) will independently assess the titles and abstracts of articles searched by electronic databases and determine their eligibility for inclusion. Hard copies of the relevant articles will be retrieved. Disagreements will be resolved by discussion, if necessary, by the arbiter (Lee MS).

### *Data extraction and management*

Two review authors (Park BK and Jun JH) will read all the articles and independently extract the data using a standard data extraction form. The form includes methodology, participants, interventions, duration of treatment, outcomes and conclusions. Consensus will be reached by discussion in the case of discrepancy. When disagreements are not resolved by discussion, they will be arbitrated by another author (Lee MS).

### *Assessment of the risk of bias in the included studies*

Three authors (Park BK, You SS and Jung JY) will assess the risk of bias using the Cochrane tool of risk of bias (version 5.1.0).<sup>29</sup> The following items will be assessed: random sequence generation (selection bias), allocation concealment (selection bias), blinding (performance bias and detection bias), incomplete outcome data (attrition bias), selective outcome reporting (reporting bias) and other bias. The evaluated domains will be assessed as Yes, No or Unclear according to the criteria. We will resolve any disagreements by discussion or arbitration (Lee MS).

### *Measurement of the treatment effect*

We will use the mean difference (MD) with 95% confidence intervals (CI) for continuous outcomes or risk ratios (RR) or odds ratio (OR) with 95% CI for binary outcomes. If the event rate lower than 1%, Peto Odds ratio (OR) with 95% CI will be used, lower than 20%, OR with 95% CI and more than 20%, RR will be used. In the case of the use of different measurement scales, standardised mean difference (SMD) analysis with 95% CI will be performed.

### *Units of analysis issues*



1  
2  
3  
4 We will include data from parallel-group studies for the meta-analysis. If we include cross-  
5  
6 over trials, only the first treatment period data will be analysed. When the trial has more than  
7  
8 one control group, the unit of analysis will be applied to each group.  
9

#### 10 11 12 13 *Dealing with missing data*

14  
15 We will try to contact the corresponding authors by e-mail if there is any missing or  
16  
17 insufficient data from the trial as much as possible. The intent-to-treat (ITT) principle will be  
18  
19 applied for statistical analysis. The individual patient data will be sought from the original  
20  
21 source or from the published trial reports when the individual patient data are unavailable.  
22  
23

#### 24 25 26 *Assessment of heterogeneity*

27  
28 We will use the random effects model for the meta-analysis. Heterogeneity will be assessed  
29  
30 by inspecting the forest plots. In addition, heterogeneity will be tested by the  $I^2$  test for  
31  
32 quantifying inconsistencies among the included studies. A result higher than 50% would  
33  
34 represent substantial heterogeneity. If heterogeneity exists, we will conduct a subgroup  
35  
36 analysis to examine the possible cause.<sup>30</sup>  
37  
38  
39  
40  
41

#### 42 *Assessment of reporting biases*

43  
44 If more than 10 trials are included in the meta-analysis, we will conduct funnel plots to assess  
45  
46 the potential for publication bias and small study effects.<sup>31</sup> Asymmetry in funnel plots  
47  
48 implied possible small study effects, such as publication bias. We will include all eligible  
49  
50 trials, regardless of their methodological quality.  
51  
52  
53  
54

#### 55 *Data synthesis*

56  
57 If there are sufficient studies and comparable outcomes, we will perform a meta-analysis  
58  
59  
60

1  
2  
3  
4 using random effect modelling.  
5

6 1. Herbal medicine versus conventional medical treatments  
7

8 2. Herbal medicine versus no treatment  
9

10 3. Herbal medicine versus placebo  
11

12 4. Herbal medicine plus conventional medical treatment versus conventional medical  
13 treatment only  
14  
15

### 16 17 18 19 *Subgroup analysis and investigation of heterogeneity*

20 If there are sufficient data, subgroup analyses will be conducted to explore the differences in  
21 the effect sizes, type of cancer, stage of cachexia<sup>4</sup> and types of herbal medicine.  
22  
23

### 24 25 26 27 *Sensitivity analysis*

28 For sensitivity analysis, the meta-analysis will be repeated, substituting decisions  
29 alternatively to test the robustness of the primary decisions of the review process. The  
30 principal decision nodes are as follows:  
31  
32

33 1. Methodological quality (sequence generation, allocation concealment or blinding in the  
34 assessment of outcomes and symptom severity);  
35  
36

37 2. Sample size (small sample size studies, e.g., over 30 in each group)  
38  
39  
40  
41  
42  
43  
44  
45

### 46 **Ethics and dissemination**

47 Ethical approval is not required, given that this protocol is for a systematic review. The  
48 review will be disseminated widely through peer-reviewed publications and conference  
49 presentations.  
50  
51  
52  
53  
54  
55  
56  
57  
58  
59  
60

1  
2  
3  
4  
5  
6  
7  
8  
9  
10  
11  
12  
13  
14  
15  
16  
17  
18  
19  
20  
21  
22  
23  
24  
25  
26  
27  
28  
29  
30  
31  
32  
33  
34  
35  
36  
37  
38  
39  
40  
41  
42  
43  
44  
45  
46  
47  
48  
49  
50  
51  
52  
53  
54  
55  
56  
57  
58  
59  
60

**Discussion**

This is the protocol for a review and there is no primary data collection. The systematic review will be published in a peer-reviewed journal and disseminated electronically or in print. Updates of the review will be conducted to inform and guide healthcare practice and policy.

For peer review only

**Funding**

The authors were supported by Korea Institute of Oriental Medicine (K13400, K13281).

**Contribution of authors**

All authors (Park BK, Jun JH, Jung JY, You SS and Lee MS) contributed to the drafting of the protocol. The protocol was revised, and the final version was approved by all authors.

The search strategy was developed and will be run by Park BK and Jun JH. Copies of studies will be obtained by Park BK and Jun JH. Selection of the studies to include will be done by Park BK and Jun JH. Lee MS will act as an arbiter in the study selection stage. Extraction of data from studies will be conducted by Park BK, Jun JH, Jung JY and You SS. Entering data into RevMan will be conducted by Park BK, Jung JY. Carrying out the analysis will be done by Park BK, Jung JY and Lee MS. Interpretation of the analysis will be done by all authors. The final review will be drafted by all authors. The review will be updated by Park BK and Lee MS.

**Competing interests**

None declared

**Data Sharing Statement**

No additional data available

## References

1. Tuca A, Jimenez-Fonseca P, Gascon P. Clinical evaluation and optimal management of cancer cachexia. *Crit Rev Oncol Hematol* 2013;**88**:625-36.
2. Evans WJ, Morley JE, Argiles J, et al. Cachexia: a new definition. *Clin Nutr* 2008;**27**:793-9.
3. Muscaritoli M, Anker SD, Argiles J, et al. Consensus definition of sarcopenia, cachexia and pre-cachexia: joint document elaborated by Special Interest Groups (SIG) "cachexia-anorexia in chronic wasting diseases" and "nutrition in geriatrics". *Clin Nutr* 2010;**29**:154-9.
4. Fearon K, Strasser F, Anker SD, et al. Definition and classification of cancer cachexia: an international consensus. *Lancet Oncol* 2011;**12**:489-95.
5. Douglas E, McMillan DC. Towards a simple objective framework for the investigation and treatment of cancer cachexia: The Glasgow Prognostic Score. Cancer treatment reviews. *Cancer Treat Rev* Published Online First: 28 November 2013. doi: 10.1016/j.ctrv.2013.11.007.
6. Tisdale MJ. Mechanisms of cancer cachexia. *Physiol Rev* 2009;**89**:381-410.
7. Tsoli M, Robertson G. Cancer cachexia: malignant inflammation, tumorkines, and metabolic mayhem. *Trends Endocrinol Metab* 2013;**24**:174-83.
8. Fearon KC, Glass DJ, Guttridge DC. Cancer cachexia: mediators, signaling, and metabolic pathways. *Cell Metab* 2012;**16**:153-66.
9. Scott HR, McMillan DC, Brown DJ, et al. A prospective study of the impact of weight loss and the systemic inflammatory response on quality of life in patients with inoperable non-small cell lung cancer. *Lung Cancer* 2003;**40**:295-9.
10. Prado CM, Baracos VE, McCargar LJ, et al. Sarcopenia as a determinant of chemotherapy toxicity and time to tumor progression in metastatic breast cancer patients receiving capecitabine treatment. *Clin Cancer Res* 2009;**15**:2920-6.

- 1  
2  
3  
4 11. Ruiz Garcia V, Lopez-Briz E, Carbonell Sanchis R, et al. Megestrol acetate for treatment  
5  
6 of anorexia-cachexia syndrome. *Cochrane Database Syst Rev* 2013;**3**:CD004310.  
7
- 8  
9 12. Argiles JM, Olivan M, Busquets S, et al. Optimal management of cancer anorexia-  
10  
11 cachexia syndrome. *Cancer Management and Research* 2010;**2**:27-38.  
12
- 13  
14 13. Nicolini A, Ferrari P, Masoni MC, et al. Malnutrition, anorexia and cachexia in cancer  
15  
16 patients: A mini-review on pathogenesis and treatment. *Biomed Pharmacother*  
17  
18 2013;**67**:807-17.  
19
- 20  
21 14. Lawsin C, DuHamel K, Itzkowitz SH, et al. Demographic, medical, and psychosocial  
22  
23 correlates to CAM use among survivors of colorectal cancer. *Support Care Cancer*  
24  
25 2007;**15**:557-64.  
26
- 27  
28 15. Matthews AK, Sellergren SA, Huo D, et al. Complementary and alternative medicine use  
29  
30 among breast cancer survivors. *J Altern Complement Med* 2007;**13**:555-62.  
31
- 32  
33 16. Kang S, Min H. Ginseng, the 'Immunity Boost': The Effects of Panax ginseng on Immune  
34  
35 System. *J Ginseng Res* 2012;**36**:354-68.  
36
- 37  
38 17. Shergis JL, Zhang AL, Zhou W, et al. Panax ginseng in randomised controlled trials: a  
39  
40 systematic review. *Phytother Res* 2013;**27**:949-65.  
41
- 42  
43 18. Harrold JA, Hughes GM, O'Shiel K, et al. Acute effects of a herb extract formulation and  
44  
45 inulin fibre on appetite, energy intake and food choice. *Appetite* 2013;**62**:84-90.  
46
- 47  
48 19. Ren S, Zhang H, Mu Y, et al. Pharmacological effects of Astragaloside IV: a literature  
49  
50 review. *J Tradit Chin Med* 2013;**33**:413-6.  
51
- 52  
53 20. Lee JJ, Lee JJ. A phase II study of an herbal decoction that includes Astragali radix for  
54  
55 cancer-associated anorexia in patients with advanced cancer. *Integr Cancer Ther*  
56  
57 2010;**9**:24-31.  
58
- 59  
60 21. Lou T, Zhang Z, Xi Z, et al. Berberine inhibits inflammatory response and ameliorates  
insulin resistance in hepatocytes. *Inflammation* 2011;**34**:659-67.

- 1  
2  
3  
4 22. Zhang J, Wang P, Ouyang H, et al. Targeting cancer-related inflammation: Chinese herbal  
5  
6 medicine inhibits epithelial-to-mesenchymal transition in pancreatic cancer. *PLoS*  
7  
8 *One* 2013;**8**:e70334.  
9
- 10 23. He DY, Dai SM. Anti-inflammatory and immunomodulatory effects of paeonia lactiflora  
11  
12 pall., a traditional chinese herbal medicine. *Front Pharmacol* 2011;**2**:10.  
13
- 14 24. Wang S, Wu X, Tan M, et al. Fighting fire with fire: poisonous Chinese herbal medicine  
15  
16 for cancer therapy. *J Ethnopharmacol* 2012;**140**:33-45.  
17
- 18 25. Lu JJ, Dang YY, Huang M, et al. Anti-cancer properties of terpenoids isolated from  
19  
20 Rhizoma Curcumae--a review. *J Ethnopharmacol* 2012;**143**:406-11.  
21
- 22 26. Chen X, Guo J, Bao J, et al. The Anticancer Properties of Salvia Miltiorrhiza Bunge  
23  
24 (Danshen): A Systematic Review. *Med Res Rev* Published Online First: 7 October  
25  
26 2013. doi: 10.1002/med.21304.  
27
- 28 27. Takeda H, Muto S, Nakagawa K, et al. Rikkunshito as a ghrelin enhancer. *Methods*  
29  
30 *Enzymol* 2012;**514**:333-51.  
31
- 32 28. Iizuka N, Miyamoto K, Hazama S, et al. Anticachectic effects of Coptidis rhizoma, an  
33  
34 anti-inflammatory herb, on esophageal cancer cells that produce interleukin 6. *Cancer*  
35  
36 *Lett* 2000;**158**:35-41.  
37
- 38 29. Higgins JPT, Altman DG, Sterne JAC. Chapter 8: Assessing risk of bias in included  
39  
40 studies. In: Higgins JPT, Green S, editors. *Cochrane Handbook for Systematic*  
41  
42 *Reviews of Interventions Version 5.1.0 (updated March 2011)*. : The Cochrane  
43  
44 Collaboration. Available from [www.cochrane-handbook.org](http://www.cochrane-handbook.org), 2011.  
45  
46  
47  
48
- 49 30. Deeks JJ, Higgins JPT, Altman DG. Chapter 9: Analysing data and undertaking meta-  
50  
51 analyses. In: Higgins JPT, Green S, editors. *Cochrane Handbook for Systematic*  
52  
53 *Reviews of Interventions Version 5.1.0 (updated March 2011)*. : The Cochrane  
54  
55 Collaboration. Available from [www.cochrane-handbook.org](http://www.cochrane-handbook.org), 2011.  
56  
57  
58  
59  
60

- 1  
2  
3  
4 31. Egger M, Davey Smith G, Schneider M, et al. Bias in meta-analysis detected by a simple,  
5  
6 graphical test. *BMJ* 1997;**315**:629-34.  
7  
8  
9  
10  
11  
12  
13  
14  
15  
16  
17  
18  
19  
20  
21  
22  
23  
24  
25  
26  
27  
28  
29  
30  
31  
32  
33  
34  
35  
36  
37  
38  
39  
40  
41  
42  
43  
44  
45  
46  
47  
48  
49  
50  
51  
52  
53  
54  
55  
56  
57  
58  
59  
60



1  
2  
3  
4  
5  
6  
7  
8  
9  
10  
11  
12  
13  
14  
15  
16  
17  
18  
19  
20  
21  
22  
23  
24  
25  
26  
27  
28  
29  
30  
31  
32  
33  
34  
35  
36  
37  
38  
39  
40  
41  
42  
43  
44  
45  
46  
47  
48  
49  
50  
51  
52  
53  
54  
55  
56  
57  
58  
59  
60

For peer review only

1  
2  
3  
4  
5  
6  
7  
8  
9

## Herbal medicines for cancer cachexia : Protocol for a systematic review

10 Bongki Park, Ji Hee Jun, Jeeyoun Jung, Sooseong You, Myeong Soo Lee

11  
12  
13 *Medical Research Division, Korea Institute of Oriental Medicine, Daejeon, South Korea*

14  
15  
16  
17 Running title: Protocol of systematic review of herbal medicine for cancer cachexia

18  
19  
20 **\*Correspondence to:**

21 Myeong Soo Lee, PhD

22 Medical Research Division,

23 Korea Institute of Oriental Medicine,

24 Daejeon, 305-811, South Korea

25 Tel: 82-(0)42-868-9266

26 Fax: 82-(0)42-868-9622

27 E-mail: drmslee@gmail.com

28  
29  
30  
31  
32  
33  
34  
35 Park BK: sanisapa@kiom.re.kr

36 Jun JH: zhixi04@kiom.re.kr

37 Jung JY: jjy0918@kiom.re.kr

38 You SS: ethink33@kiom.re.kr

39  
40  
41  
42  
43  
44  
45  
46  
47  
48  
49  
50  
51  
52  
53  
54  
55  
56  
57  
58  
59  
60  
Lee MS: drmslee@gmail.com

1  
2  
3  
4 License statement

5  
6 *The Corresponding Author has the right to grant on behalf of all authors and does grant on*  
7  
8 *behalf of all authors, an exclusive licence (or non-exclusive for government employees) on a*  
9  
10 *worldwide basis to the BMJ Publishing Group Ltd and its Licensees to permit this article (if*  
11  
12 *accepted) to be published in BMJ Open and any other BMJPGJ products to exploit all*  
13  
14 *subsidiary rights, as set out in our licence ([http://group.bmj.com/products/journals/](http://group.bmj.com/products/journals/instructions-for-authors/licence-forms)*  
15 *instructions-for-authors/licence-forms).*  
16  
17  
18  
19  
20  
21  
22  
23  
24  
25  
26  
27  
28  
29  
30  
31  
32  
33  
34  
35  
36  
37  
38  
39  
40  
41  
42  
43  
44  
45  
46  
47  
48  
49  
50  
51  
52  
53  
54  
55  
56  
57  
58  
59  
60

### Article focus

- *This systematic review aims to evaluate randomized controlled trials and quasi-randomised trials and to present the efficacy of herbal medicines for cancer cachexia.*

### Key messages

- *This systematic review will be performed with a comprehensive search strategy and will establish the current state of the evidence using unbiased methods.*

### Strengths and limitations of this study

- *The strength of this review is its extensive, unbiased search of various databases without language restriction.*
- *The trial screening and data extraction will be conducted independently by two authors.*
- *The review team consists of experts from each field: traditional Korean medicine (Park BK, Jung JY), traditional Chinese medicine (Jun JH), conventional medicine (You SS) and methodology (Lee MS).*

## Abstract

**Introduction:** To assess the efficacy of herbal medicines as a treatment of cancer cachexia.

**Methods and analysis:** We will search the following thirteen electronic databases from their inception. MEDLINE (PubMed), the Cochrane Central Register of Controlled Trials (CENTRAL), EMBASE, Allied and Complementary Medicine Database (AMED), China National Knowledge Infrastructure (CNKI), Wanfang, Journal Integration Platform (VIP) and six Korean Medical Databases (Korean Studies Information, DBPIA, Korea Institute of Science Technology Information, Research Information Center for Health Database, Korean Medline, and National Assembly Library) without restrictions on time or language. The data will be extracted independently by two authors using pre-defined criteria. Disagreements will be resolved by discussion between the authors. The risk of bias will be assessed using the Cochrane of risk of bias tool.

**Dissemination:** The review will be published in a journal. The review will also be disseminated electronically and in print. An updated<sup>d</sup> of the review will be conducted to inform and guide healthcare practice and policy.

**Trial registration number:** PROSPERO 2013:CRD42013006612

**Keywords:** Cancer, cachexia, herbal medicine, traditional East Asian medicine, randomised clinical trials, systematic review

## Introduction

### *Description of the condition*

Cancer cachexia is a common syndrome among cancer patients, especially in advanced cancer. More than 70~80% of advanced cancer patients suffer from cachexia.<sup>1</sup>

Generally, cachexia is characterised by loss of weight, muscle atrophy, anorexia and fatigue.

The definition of cancer cachexia differs slightly according to the research study,<sup>2-5</sup> but the recent international consensus has defined cancer cachexia as a multifactorial syndrome characterised by ongoing loss of skeletal muscle mass (with or without loss of fat mass) that cannot be fully reversed by conventional nutritional support and leads to progressive functional impairment.<sup>4</sup> The pathophysiology of cancer cachexia is a negative energy balance caused by a variable combination of reduced food intake and abnormal metabolism.<sup>4 6</sup> The metabolic mechanisms of adipose mass reduction, loss of skeletal muscle and protein degradation are known to be mediated by pro-inflammatory cytokines, neuropeptides, hormones, catabolic factors and digestive factors.<sup>1 6-8</sup>

Cancer cachexia causes numerous clinical problems. Cancer cachexia reduces activity or quality of life<sup>9</sup> and restricts conventional therapy such as chemotherapy.<sup>10</sup> Above all, Cancer cachexia is associated with a poor survival rate.<sup>11 12</sup> In various cancer types, the survival of patients with cachexia is shorter than that of other patients.<sup>1</sup>

### *Description of the intervention*

There are several agents for managing cancer cachexia. Megestrol acetate, cannabinoids, corticosteroids and ghrelin are known to affect appetite. EPA, HMB, thalidomide, corticosteroids and non-steroidal anti-inflammatory drugs are known to affect cachectic mediators or signal pathways.<sup>1 6 13</sup> Some drugs, such as megestrol acetate and corticosteroids exhibit confirmed effectiveness in combatting cancer cachexia by randomised controlled

1  
2  
3  
4 trials and systematic reviews.<sup>1</sup> However, to date, there is no identified standard treatment for  
5  
6 cancer cachexia.

7  
8 Herbal medicines have been used widely to treat diverse diseases for thousands of years.  
9  
10 Especially in East Asia, herbal medicines have been developed on a basis of unique theories:  
11  
12 Yin and Yang, the five elements and visceral manifestation theory. The major principle of  
13  
14 treating diseases is reinforcing the healthy qi and eliminating the pathogenic factors. Many  
15  
16 herbal medicines are prescribed according to this principle.  
17

18  
19 Recently, herbal medicines have been used to alleviate the adverse effects of conventional  
20  
21 therapies or to improve a quality of life. A survey demonstrated that 75% of colorectal cancer  
22  
23 patients used at least one type of complementary alternative medicine (CAM) during their  
24  
25 lifetimes.<sup>14</sup> Another survey reported that 39% of breast cancer patients used herbs or medical  
26  
27 herbal teas.<sup>15</sup>  
28  
29

### 30 31 32 ***How the intervention might work***

33  
34 Some herbs, such as ginseng radix, astragali radix or some herbal prescriptions, are known to  
35  
36 increase appetite, facilitate physical function and boost immune function.<sup>16-20</sup> Other herbs,  
37  
38 such as coptidis rhizoma, exhibit anti-inflammatory functions.<sup>21-23</sup> Many herbs are associated  
39  
40 with anti-cancer properties including cancer cell - cytotoxicity, cell-apoptosis and invasion  
41  
42 and metastasis prevention.<sup>24-26</sup>  
43  
44

45  
46 Many practitioners and researchers have attempted to explore herbal medicines for the  
47  
48 treatment of cancer cachexia. The oral administration of Rikkunshito is known to stimulate  
49  
50 ghrelin secretion.<sup>27</sup> One research study reported that coptidis rhizoma might exhibit an anti-  
51  
52 cachectic effect and that berberine, the major component, might prevent cancer-induced  
53  
54 cachexia.<sup>28</sup>  
55  
56  
57  
58  
59  
60

### ***Why it is important to do this review***

To our knowledge, no systematic reviews assessing herbal medicines in cancer cachexia have been conducted. There is no identified standard treatment for cancer cachexia, and a comprehensive evaluation of the efficacy and the safety of herbal medicines will inform the recommendation for treatment of cancer cachexia.

### **Objectives**

To assess the efficacy of herbal medicines for cancer cachexia.

### **Methods**

#### ***Criteria for considering studies for this review***

##### *Types of studies*

Randomised controlled trials (RCTs) and quasi-randomised trials (quasi-RCTs) will be included in this systematic review without restrictions on time or language.

##### *Types of participants*

The participants will include cancer patients diagnosed by histological or clinical diagnosis who meet the international consensus of cancer cachexia<sup>4</sup>. The diagnostic criteria for cancer cachexia are as follows :

1. Weight loss > 5% over the past 6 months (in absence of simple starvation); or
2. Body Mass Index (BMI) < 20 and any degree of weight loss > 2%; or
3. Appendicular skeletal muscle index consistent with sarcopenia (males<7.26 kg/m; females<5.45 kg/m) and any degree of weight loss >2%

##### *Types of interventions*



1  
2  
3  
4 All types of herbal medicines will be included. There is no limitation on the number of herbs,  
5  
6 administration methods, dosage or duration of treatment. The comparisons will be either with  
7  
8 other therapeutic agents such as megestrol acetate or corticosteroids or with no other  
9  
10 treatment.  
11

### 12 13 14 15 *Types of outcome measures*

#### 16 17 Primary outcomes

- 18 1. Weight gain.
- 19 2. Body composition.

#### 20 21 22 Secondary outcomes

- 23 1. Improvement in quality of life by means of a validated instrument.
- 24 2. Increase of appetite.
- 25 3. Reduction in fatigue.
- 26 4. Serum levels of inflammatory markers, including ESR and CRP as well as TNF-alpha, IL-  
27  
28 1, IL-6, and IFN-gamma.

#### 29 30 31 32 33 34 35 36 37 5. Survival rate

- 38  
39  
40  
41  
42  
43  
44  
45  
46  
47  
48  
49  
50  
51  
52  
53  
54  
55  
56  
57  
58  
59  
60  
61  
62  
63  
64  
65  
66  
67  
68  
69  
70  
71  
72  
73  
74  
75  
76  
77  
78  
79  
80  
81  
82  
83  
84  
85  
86  
87  
88  
89  
90  
91  
92  
93  
94  
95  
96  
97  
98  
99  
100  
101  
102  
103  
104  
105  
106  
107  
108  
109  
110  
111  
112  
113  
114  
115  
116  
117  
118  
119  
120  
121  
122  
123  
124  
125  
126  
127  
128  
129  
130  
131  
132  
133  
134  
135  
136  
137  
138  
139  
140  
141  
142  
143  
144  
145  
146  
147  
148  
149  
150  
151  
152  
153  
154  
155  
156  
157  
158  
159  
160  
161  
162  
163  
164  
165  
166  
167  
168  
169  
170  
171  
172  
173  
174  
175  
176  
177  
178  
179  
180  
181  
182  
183  
184  
185  
186  
187  
188  
189  
190  
191  
192  
193  
194  
195  
196  
197  
198  
199  
200  
201  
202  
203  
204  
205  
206  
207  
208  
209  
210  
211  
212  
213  
214  
215  
216  
217  
218  
219  
220  
221  
222  
223  
224  
225  
226  
227  
228  
229  
230  
231  
232  
233  
234  
235  
236  
237  
238  
239  
240  
241  
242  
243  
244  
245  
246  
247  
248  
249  
250  
251  
252  
253  
254  
255  
256  
257  
258  
259  
260  
261  
262  
263  
264  
265  
266  
267  
268  
269  
270  
271  
272  
273  
274  
275  
276  
277  
278  
279  
280  
281  
282  
283  
284  
285  
286  
287  
288  
289  
290  
291  
292  
293  
294  
295  
296  
297  
298  
299  
300  
301  
302  
303  
304  
305  
306  
307  
308  
309  
310  
311  
312  
313  
314  
315  
316  
317  
318  
319  
320  
321  
322  
323  
324  
325  
326  
327  
328  
329  
330  
331  
332  
333  
334  
335  
336  
337  
338  
339  
340  
341  
342  
343  
344  
345  
346  
347  
348  
349  
350  
351  
352  
353  
354  
355  
356  
357  
358  
359  
360  
361  
362  
363  
364  
365  
366  
367  
368  
369  
370  
371  
372  
373  
374  
375  
376  
377  
378  
379  
380  
381  
382  
383  
384  
385  
386  
387  
388  
389  
390  
391  
392  
393  
394  
395  
396  
397  
398  
399  
400  
401  
402  
403  
404  
405  
406  
407  
408  
409  
410  
411  
412  
413  
414  
415  
416  
417  
418  
419  
420  
421  
422  
423  
424  
425  
426  
427  
428  
429  
430  
431  
432  
433  
434  
435  
436  
437  
438  
439  
440  
441  
442  
443  
444  
445  
446  
447  
448  
449  
450  
451  
452  
453  
454  
455  
456  
457  
458  
459  
460  
461  
462  
463  
464  
465  
466  
467  
468  
469  
470  
471  
472  
473  
474  
475  
476  
477  
478  
479  
480  
481  
482  
483  
484  
485  
486  
487  
488  
489  
490  
491  
492  
493  
494  
495  
496  
497  
498  
499  
500  
501  
502  
503  
504  
505  
506  
507  
508  
509  
510  
511  
512  
513  
514  
515  
516  
517  
518  
519  
520  
521  
522  
523  
524  
525  
526  
527  
528  
529  
530  
531  
532  
533  
534  
535  
536  
537  
538  
539  
540  
541  
542  
543  
544  
545  
546  
547  
548  
549  
550  
551  
552  
553  
554  
555  
556  
557  
558  
559  
560  
561  
562  
563  
564  
565  
566  
567  
568  
569  
570  
571  
572  
573  
574  
575  
576  
577  
578  
579  
580  
581  
582  
583  
584  
585  
586  
587  
588  
589  
590  
591  
592  
593  
594  
595  
596  
597  
598  
599  
600  
601  
602  
603  
604  
605  
606  
607  
608  
609  
610  
611  
612  
613  
614  
615  
616  
617  
618  
619  
620  
621  
622  
623  
624  
625  
626  
627  
628  
629  
630  
631  
632  
633  
634  
635  
636  
637  
638  
639  
640  
641  
642  
643  
644  
645  
646  
647  
648  
649  
650  
651  
652  
653  
654  
655  
656  
657  
658  
659  
660  
661  
662  
663  
664  
665  
666  
667  
668  
669  
670  
671  
672  
673  
674  
675  
676  
677  
678  
679  
680  
681  
682  
683  
684  
685  
686  
687  
688  
689  
690  
691  
692  
693  
694  
695  
696  
697  
698  
699  
700  
701  
702  
703  
704  
705  
706  
707  
708  
709  
710  
711  
712  
713  
714  
715  
716  
717  
718  
719  
720  
721  
722  
723  
724  
725  
726  
727  
728  
729  
730  
731  
732  
733  
734  
735  
736  
737  
738  
739  
740  
741  
742  
743  
744  
745  
746  
747  
748  
749  
750  
751  
752  
753  
754  
755  
756  
757  
758  
759  
760  
761  
762  
763  
764  
765  
766  
767  
768  
769  
770  
771  
772  
773  
774  
775  
776  
777  
778  
779  
780  
781  
782  
783  
784  
785  
786  
787  
788  
789  
790  
791  
792  
793  
794  
795  
796  
797  
798  
799  
800  
801  
802  
803  
804  
805  
806  
807  
808  
809  
810  
811  
812  
813  
814  
815  
816  
817  
818  
819  
820  
821  
822  
823  
824  
825  
826  
827  
828  
829  
830  
831  
832  
833  
834  
835  
836  
837  
838  
839  
840  
841  
842  
843  
844  
845  
846  
847  
848  
849  
850  
851  
852  
853  
854  
855  
856  
857  
858  
859  
860  
861  
862  
863  
864  
865  
866  
867  
868  
869  
870  
871  
872  
873  
874  
875  
876  
877  
878  
879  
880  
881  
882  
883  
884  
885  
886  
887  
888  
889  
890  
891  
892  
893  
894  
895  
896  
897  
898  
899  
900  
901  
902  
903  
904  
905  
906  
907  
908  
909  
910  
911  
912  
913  
914  
915  
916  
917  
918  
919  
920  
921  
922  
923  
924  
925  
926  
927  
928  
929  
930  
931  
932  
933  
934  
935  
936  
937  
938  
939  
940  
941  
942  
943  
944  
945  
946  
947  
948  
949  
950  
951  
952  
953  
954  
955  
956  
957  
958  
959  
960  
961  
962  
963  
964  
965  
966  
967  
968  
969  
970  
971  
972  
973  
974  
975  
976  
977  
978  
979  
980  
981  
982  
983  
984  
985  
986  
987  
988  
989  
990  
991  
992  
993  
994  
995  
996  
997  
998  
999  
1000

### 46 47 *Search methods for the identification of studies*

#### 48 49 Electronic searches

50 We will search the following electronic databases regardless of publication date or language:

- 51 ● MEDLINE (PubMed),
- 52
- 53 ● The Cochrane Central Register of Controlled Trials (CENTRAL),
- 54
- 55 ● EMBASE,
- 56
- 57
- 58
- 59
- 60

- Allied and Complementary Medicine Database (AMED),
- China National Knowledge Infrastructure (CNKI),
- Wanfang Database.
- VIP (Journal Integration Platform)
- Six Korean Medical Databases (Korean Studies Information, DBPIA, Korea Institute of Science Technology Information, Research Information Center for Health Database, Korean Medline, and National Assembly Library)

### Other sources

We will scan the reference lists of reviews and retrieve articles for additional studies. In addition, we will search the WHO International Clinical Trials Registry Platform (ICTRP) (<http://apps.who.int/trialsearch/>), ~~the metaRegister of Controlled Trials (mRCT)~~ ([www.controlled-trials.com/mrct](http://www.controlled-trials.com/mrct)), ~~clinical-trials.gov~~ ([www.Clinicaltrials.gov](http://www.Clinicaltrials.gov)) and Google scholar (<http://scholar.google.co.kr/>).

### *Search strategy*

We will model subject strategies for databases on the search strategy designed for MEDLINE (PubMed; see Appendix 1) and CNKI (see Appendix 2) and modify it for use in the other databases.

### ***Data collection and analysis***

#### *Selection of studies*

Two review authors (Park BK and Jun JH) will independently assess the titles and abstracts of articles searched by electronic databases and determine their eligibility for inclusion. Hard copies of the relevant articles will be retrieved. Disagreements will be resolved by discussion,

1  
2  
3  
4 if necessary, by the arbiter (Lee MS).  
5  
6  
7

#### 8 *Data extraction and management* 9

10 Two review authors (Park BK and Jun JH) will read all the articles and independently extract  
11 the data using a standard data extraction form. The form includes methodology, participants,  
12 interventions, duration of treatment, outcomes and conclusions. Consensus will be reached by  
13 discussion in the case of discrepancy. When disagreements are not resolved by discussion,  
14 they will be arbitrated by another author (Lee MS).  
15  
16  
17  
18  
19  
20  
21  
22  
23

#### 24 *Assessment of the risk of bias in the included studies* 25

26 Three authors (Park BK, You SS and Jung JY) will assess the risk of bias using the Cochrane  
27 tool of risk of bias (version 5.1.0).<sup>29</sup> The following items will be assessed: random sequence  
28 generation (selection bias), allocation concealment (selection bias), blinding (performance  
29 bias and detection bias), incomplete outcome data (attrition bias), selective outcome reporting  
30 (reporting bias) and other bias. The evaluated domains will be assessed as Yes, No or Unclear  
31 according to the criteria. We will resolve any disagreements by discussion or arbitration (Lee  
32 MS).  
33  
34  
35  
36  
37  
38  
39  
40  
41  
42  
43

#### 44 *Measurement of the treatment effect* 45

46 We will use the mean difference (MD) with 95% confidence intervals (CI) for continuous  
47 outcomes or risk ratios (RR) or odds ratios (OR) with 95% CI for binary outcomes. If the  
48 event rate lower than 1%, Peto odds ratio (OR) with 95% CI will be used, lower than 20%,  
49 OR with 95% CI and more than 20%, RR will be used. In the case of the use of different  
50 measurement scales, standardised mean difference (SMD) analysis with 95% CI will be  
51 performed.  
52  
53  
54  
55  
56  
57  
58  
59  
60

### *Units of analysis issues*

We will include data from parallel-group studies for the meta-analysis. If we include cross-over trials, only the first treatment period data will be analysed. When the trial has more than one control group, the unit of analysis will be applied to each group.

### *Dealing with missing data*

We will try to contact the corresponding authors by e-mail if there is any missing or insufficient data from the trial as much as possible. The intent-to-treat (ITT) principle will be applied for statistical analysis. The individual patient data will be sought from the original source or from the published trial reports when the individual patient data are unavailable.

### *Assessment of heterogeneity*

We will use the random effects model for the meta-analysis. Heterogeneity will be assessed by inspecting the forest plots. In addition, heterogeneity will be tested by the  $I^2$  test for quantifying inconsistencies among the included studies. A result higher than 50% would represent substantial heterogeneity. If heterogeneity exists, we will conduct a subgroup analysis to examine the possible cause.<sup>30</sup>

### *Assessment of reporting biases*

If more than 10 trials are included in the meta-analysis, we will conduct funnel plots to assess the potential for publication bias and small study effects.<sup>31</sup> Asymmetry in funnel plots implied possible small study effects, such as publication bias. We will include all eligible trials, regardless of their methodological quality.

### *Data synthesis*

If there are sufficient studies and comparable outcomes, we will perform a meta-analysis using random effect modelling.

1. Herbal medicine versus conventional medical treatments
2. Herbal medicine versus no treatment
3. Herbal medicine versus placebo
4. Herbal medicine plus conventional medical treatment versus conventional medical treatment only

### *Subgroup analysis and investigation of heterogeneity*

If there are sufficient data, subgroup analyses will be conducted to explore the differences in the effect sizes, type of cancer, stage of cachexia<sup>4</sup> and types of herbal medicine.

### *Sensitivity analysis*

For sensitivity analysis, the meta-analysis will be repeated, substituting decisions alternatively to test the robustness of the primary decisions of the review process. The principal decision nodes are as follows:

1. Methodological quality (sequence generation, allocation concealment or blinding in the assessment of outcomes and symptom severity);
2. Sample size (small sample size studies, e.g., over 30 in each group)

### **Ethics and dissemination**

Ethical approval is not required, given that this protocol is for a systematic review. The review will be disseminated widely through peer-reviewed publications and conference presentations.

## Discussion

This is the protocol for a review and there is no primary data collection. The systematic review will be published in a peer-reviewed journal and disseminated electronically or in print. [Update of the review will be conducted to inform and guide healthcare practice and policy.](#)

For peer review only

**Contribution of authors**

All authors (Park BK, Jun JH, Jung JY, You SS and Lee MS) contributed to the drafting of the protocol. The protocol was revised, and the final version was approved by all authors. The search strategy was developed and will be run by Park BK and Jun JH. Copies of studies will be obtained by Park BK and Jun JH. Selection of the studies to include will be done by Park BK and Jun JH. Lee MS will act as an arbiter in the study selection stage. Extraction of data from studies will be conducted by Park BK, Jun JH, Jung JY and You SS. Entering data into RevMan will be conducted by Park BK, Jung JY. Carrying out the analysis will be done by Park BK, Jung JY and Lee MS. Interpretation of the analysis will be done by all authors. The final review will be drafted by all authors. The review will be updated by Park BK and Lee MS.

**Competing interests**

None declared

**Funding**

The authors were supported by Korea Institute of Oriental Medicine (K13400, K13281).

## References

1. Tuca A, Jimenez-Fonseca P, Gascon P. Clinical evaluation and optimal management of cancer cachexia. *Crit Rev Oncol Hematol* 2013;**88**:625-36.
2. Evans WJ, Morley JE, Argiles J, et al. Cachexia: a new definition. *Clin Nutr* 2008;**27**:793-9.
3. Muscaritoli M, Anker SD, Argiles J, et al. Consensus definition of sarcopenia, cachexia and pre-cachexia: joint document elaborated by Special Interest Groups (SIG) "cachexia-anorexia in chronic wasting diseases" and "nutrition in geriatrics". *Clin Nutr* 2010;**29**:154-9.
4. Fearon K, Strasser F, Anker SD, et al. Definition and classification of cancer cachexia: an international consensus. *Lancet Oncol* 2011;**12**:489-95.
5. Douglas E, McMillan DC. Towards a simple objective framework for the investigation and treatment of cancer cachexia: The Glasgow Prognostic Score. Cancer treatment reviews. *Cancer Treat Rev* Published Online First: 28 November 2013. doi: 10.1016/j.ctrv.2013.11.007.
6. Tisdale MJ. Mechanisms of cancer cachexia. *Physiol Rev* 2009;**89**:381-410.
7. Tsoli M, Robertson G. Cancer cachexia: malignant inflammation, tumorkines, and metabolic mayhem. *Trends Endocrinol Metab* 2013;**24**:174-83.
8. Fearon KC, Glass DJ, Guttridge DC. Cancer cachexia: mediators, signaling, and metabolic pathways. *Cell Metab* 2012;**16**:153-66.
9. Scott HR, McMillan DC, Brown DJ, et al. A prospective study of the impact of weight loss and the systemic inflammatory response on quality of life in patients with inoperable non-small cell lung cancer. *Lung Cancer* 2003;**40**:295-9.
10. Prado CM, Baracos VE, McCargar LJ, et al. Sarcopenia as a determinant of chemotherapy toxicity and time to tumor progression in metastatic breast cancer patients receiving capecitabine treatment. *Clin Cancer Res* 2009;**15**:2920-6.



- 1  
2  
3  
4 11. Ruiz Garcia V, Lopez-Briz E, Carbonell Sanchis R, et al. Megestrol acetate for treatment  
5  
6 of anorexia-cachexia syndrome. *Cochrane Database Syst Rev* 2013;**3**:CD004310.  
7
- 8  
9 12. Argiles JM, Olivan M, Busquets S, et al. Optimal management of cancer anorexia-  
10  
11 cachexia syndrome. *Cancer Management and Research* 2010;**2**:27-38.  
12
- 13 13. Nicolini A, Ferrari P, Masoni MC, et al. Malnutrition, anorexia and cachexia in cancer  
14  
15 patients: A mini-review on pathogenesis and treatment. *Biomed Pharmacother*  
16  
17 2013;**67**:807-17.  
18
- 19 14. Lawsin C, DuHamel K, Itzkowitz SH, et al. Demographic, medical, and psychosocial  
20  
21 correlates to CAM use among survivors of colorectal cancer. *Support Care Cancer*  
22  
23 2007;**15**:557-64.  
24
- 25 15. Matthews AK, Sellergren SA, Huo D, et al. Complementary and alternative medicine use  
26  
27 among breast cancer survivors. *J Altern Complement Med* 2007;**13**:555-62.  
28
- 29 16. Kang S, Min H. Ginseng, the 'Immunity Boost': The Effects of Panax ginseng on Immune  
30  
31 System. *J Ginseng Res* 2012;**36**:354-68.  
32
- 33 17. Shergis JL, Zhang AL, Zhou W, et al. Panax ginseng in randomised controlled trials: a  
34  
35 systematic review. *Phytother Res* 2013;**27**:949-65.  
36  
37
- 38 18. Harrold JA, Hughes GM, O'Shiel K, et al. Acute effects of a herb extract formulation and  
39  
40 inulin fibre on appetite, energy intake and food choice. *Appetite* 2013;**62**:84-90.  
41  
42
- 43 19. Ren S, Zhang H, Mu Y, et al. Pharmacological effects of Astragaloside IV: a literature  
44  
45 review. *J Tradit Chin Med* 2013;**33**:413-6.  
46  
47
- 48 20. Lee JJ, Lee JJ. A phase II study of an herbal decoction that includes Astragali radix for  
49  
50 cancer-associated anorexia in patients with advanced cancer. *Integr Cancer Ther*  
51  
52 2010;**9**:24-31.  
53
- 54 21. Lou T, Zhang Z, Xi Z, et al. Berberine inhibits inflammatory response and ameliorates  
55  
56 insulin resistance in hepatocytes. *Inflammation* 2011;**34**:659-67.  
57  
58  
59  
60

- 1  
2  
3  
4 22. Zhang J, Wang P, Ouyang H, et al. Targeting cancer-related inflammation: Chinese herbal  
5  
6 medicine inhibits epithelial-to-mesenchymal transition in pancreatic cancer. *PLoS*  
7  
8 *One* 2013;**8**:e70334.  
9
- 10 23. He DY, Dai SM. Anti-inflammatory and immunomodulatory effects of paeonia lactiflora  
11  
12 pall., a traditional chinese herbal medicine. *Front Pharmacol* 2011;**2**:10.  
13
- 14 24. Wang S, Wu X, Tan M, et al. Fighting fire with fire: poisonous Chinese herbal medicine  
15  
16 for cancer therapy. *J Ethnopharmacol* 2012;**140**:33-45.  
17
- 18 25. Lu JJ, Dang YY, Huang M, et al. Anti-cancer properties of terpenoids isolated from  
19  
20 Rhizoma Curcumae--a review. *J Ethnopharmacol* 2012;**143**:406-11.  
21
- 22 26. Chen X, Guo J, Bao J, et al. The Anticancer Properties of Salvia Miltiorrhiza Bunge  
23  
24 (Danshen): A Systematic Review. *Med Res Rev* Published Online First: 7 October  
25  
26 2013. doi: 10.1002/med.21304.  
27
- 28 27. Takeda H, Muto S, Nakagawa K, et al. Rikkunshito as a ghrelin enhancer. *Methods*  
29  
30 *Enzymol* 2012;**514**:333-51.  
31
- 32 28. Iizuka N, Miyamoto K, Hazama S, et al. Anticachectic effects of Coptidis rhizoma, an  
33  
34 anti-inflammatory herb, on esophageal cancer cells that produce interleukin 6. *Cancer*  
35  
36 *Lett* 2000;**158**:35-41.  
37
- 38 29. Higgins JPT, Altman DG, Sterne JAC. Chapter 8: Assessing risk of bias in included  
39  
40 studies. In: Higgins JPT, Green S, editors. *Cochrane Handbook for Systematic*  
41  
42 *Reviews of Interventions Version 5.1.0 (updated March 2011)*. : The Cochrane  
43  
44 Collaboration. Available from [www.cochrane-handbook.org](http://www.cochrane-handbook.org), 2011.  
45  
46  
47  
48  
49
- 50 30. Deeks JJ, Higgins JPT, Altman DG. Chapter 9: Analysing data and undertaking meta-  
51  
52 analyses. In: Higgins JPT, Green S, editors. *Cochrane Handbook for Systematic*  
53  
54 *Reviews of Interventions Version 5.1.0 (updated March 2011)*. : The Cochrane  
55  
56 Collaboration. Available from [www.cochrane-handbook.org](http://www.cochrane-handbook.org), 2011.  
57  
58  
59  
60

1  
2  
3  
4  
5  
6  
7  
8  
9  
10  
11  
12  
13  
14  
15  
16  
17  
18  
19  
20  
21  
22  
23  
24  
25  
26  
27  
28  
29  
30  
31  
32  
33  
34  
35  
36  
37  
38  
39  
40  
41  
42  
43  
44  
45  
46  
47  
48  
49  
50  
51  
52  
53  
54  
55  
56  
57  
58  
59  
60

31. Egger M, Davey Smith G, Schneider M, et al. Bias in meta-analysis detected by a simple, graphical test. *BMJ* 1997;**315**:629-34.

For peer review only

## APPENDICES

### *Appendix 1. MEDLINE (Pubmed) search strategy*

#1. exp Neoplasms/

#2. (cancer or oncolog\* or neoplasm\* or malignan\* or tumor or tumour or carcinoma\* or adenocarcinoma\* or osteosarcoma\* or sarcoma\* or leukemi\* or lymphoma\* or teratoma\* or metastat\*).mp.

#3. #1 or #2

#4. exp Weight loss/

#5. exp Malnutrition/

#6. (cachexia\* or cachectic\* or weight loss or loss of weight or underweight or malnutrition or wasting syndrome or anorexia\* or muscle atrophy or sarcopenia).mp.

#7. or/#4-#6

#8. exp Medicine, East Asian Traditional/

#9. exp Drugs, Chinese herbal/

#10. exp Herbal Medicine/

#11. exp Plants, Medicinal/

#12. (traditional Korean medicine or traditional Chinese medicine or Traditional oriental medicine or Kampo medicine or alternative medicine or complementary medicine or herb or herbal or herbs or decoction\* or botanic\*).mp.

#13. or/#8-#12

#14. exp Randomized Controlled Trials as Topic/

#15. exp Clinical Trials as Topic/

#16. exp controlled clinical trials as topic/

#17. (randomized controlled trial\* or controlled clinical trial\* or randomized\* or randomly\* or placebo or clinical trial\* or controlled trial\*).mp.

1  
2  
3  
4 #18. or/#14 - #17  
5

6 #19. #3 and #7 and #13 and #18  
7  
8  
9

10  
11 *Appendix 2. CNKI search strategy*

12  
13 (恶病质 or 恶液质 or 癌症恶病质 or 癌恶病质 or 肿瘤恶病质 or 癌性恶病质) and

14  
15  
16 (中医药 or 中医 or 中西医结合 or 汉方 or 汉方医学 or 东洋医学 or 中药 or 中草

17  
18  
19 药 or 中药制剂 or 汤 or 丸 or 散 or 注射液 or 口服液 or 中成药 or 饮) and (随机

20  
21  
22  
23 or 对照)  
24  
25  
26  
27  
28  
29  
30  
31  
32  
33  
34  
35  
36  
37  
38  
39  
40  
41  
42  
43  
44  
45  
46  
47  
48  
49  
50  
51  
52  
53  
54  
55  
56  
57  
58  
59  
60

## APPENDICES

### *Appendix 1. MEDLINE (Pubmed) search strategy*

#1. exp Neoplasms/

#2. (cancer or oncolog\* or neoplasm\* or malignan\* or tumor or tumour or carcinoma\* or adenocarcinoma\* or osteosarcoma\* or sarcoma\* or leukemi\* or lymphoma\* or teratoma\* or metastat\*).mp.

#3. #1 or #2

#4. exp Weight loss/

#5. exp Malnutrition/

#6. (cachexia\* or cachectic\* or weight loss or loss of weight or underweight or malnutrition or wasting syndrome or anorexia\* or muscle atrophy or sarcopenia).mp.

#7. or/#4-#6

#8. exp Medicine, East Asian Traditional/

#9. exp Drugs, Chinese herbal/

#10. exp Herbal Medicine/

#11. exp Plants, Medicinal/

#12. (traditional Korean medicine or traditional Chinese medicine or Traditional oriental medicine or Kampo medicine or alternative medicine or complementary medicine or herb or herbal or herbs or decoction\* or botanic\*).mp.

#13. or/#8-#12

#14. exp Randomized Controlled Trials as Topic/

#15. exp Clinical Trials as Topic/

#16. exp controlled clinical trials as topic/

#17. (randomized controlled trial\* or controlled clinical trial\* or randomized\* or randomly\* or placebo or clinical trial\* or controlled trial\*).mp.

1  
2  
3  
4 #18. or/#14 - #17  
5  
6

7 #19. #3 and #7 and #13 and #18  
8  
9

10  
11 ***Appendix 2. CNKI search strategy***  
12

13  
14 (恶病质 or 恶液质 or 癌症恶病质 or 癌恶病质 or 肿瘤恶病质 or 癌性恶病质) and (中医  
15  
16  
17  
18 药 or 中医 or 中西医结合 or 汉方 or 汉方医学 or 东洋医学 or 中药 or 中草药 or 中药制  
19  
20  
21 剂 or 汤 or 丸 or 散 or 注射液 or 口服液 or 中成药 or 饮) and (随机 or 对照)  
22  
23  
24  
25  
26  
27  
28  
29  
30  
31  
32  
33  
34  
35  
36  
37  
38  
39  
40  
41  
42  
43  
44  
45  
46  
47  
48  
49  
50  
51  
52  
53  
54  
55  
56  
57  
58  
59  
60
